# Supplementary material
Source: PubMed Central journal article supplement (PMC4019163)

1 **Supplemental Figure Legends (Tam et al.)**

2

3 **Figure S1, related to Figure 1.** (A) Percentages of CD11b<sup>+</sup> Gr-1<sup>+</sup> cells in spleens (left) and  
4 livers (right) of 129X1/SvJ mice (n = 4-5 per group per time point) left uninfected (UI) or  
5 infected for 7 or 60 days with *S. Typhimurium*. (B) Absolute numbers (left) and percentages  
6 (right) of CD11b<sup>+</sup> Gr-1<sup>+</sup> cells in spleens of C57BL/6J mice (n = 10 per group) left UI or  
7 infected for 7 days with *S. Typhimurium* (STm). Data show mean with spread from a single  
8 experiment that is representative of two independent experiments. Data were analyzed using a  
9 one-way ANOVA with Bonferroni's multiple comparisons post test (A) or using a two-tailed,  
10 paired Student's t-test (B); p values < 0.05 were considered to be statistically significant.  
11 Asterisks indicate statistically significant differences (\*\*\* p < 0.001, \*\* p < 0.01, \* p < 0.05).

12

13 **Figure S2, related to Figure 3.** (A) Percentages of CD11b<sup>+</sup> Ly6C<sup>hi</sup> Ly6G<sup>-</sup> cells (left) and  
14 CD11b<sup>+</sup> Ly6C<sup>int</sup> Ly6G<sup>+</sup> cells (right) in spleens (top) and livers (bottom) of 129X1/SvJ mice (n  
15 = 5 per group per time point) left uninfected (UI) or infected for up to 90 days with *S.*  
16 *Typhimurium*. (B) Percentages of CD11b<sup>+</sup> Ly6C<sup>hi</sup> Ly6G<sup>-</sup> cells (left) and CD11b<sup>+</sup> Ly6C<sup>int</sup>  
17 Ly6G<sup>+</sup> cells (right) in mesenteric lymph nodes of 129X1/SvJ mice (n = 5 per group per time  
18 point) left uninfected (UI) or infected for up to 90 days with *S. Typhimurium*. Data show  
19 mean with spread (A) or analysis of combined single cell suspensions of mesenteric lymph  
20 nodes from five mice per group per time point (B) from a single experiment that is  
21 representative of two independent experiments. Data were analyzed using a one-way  
22 ANOVA; p values < 0.05 were considered to be statistically significant.

23

24 **Figure S3, related to Figure 7.** (A) Bacterial loads per gram of spleen (left) and liver (right)  
25 tissue of 129X1/SvJ mice (n = 4 per group per time point) infected with *S. Typhimurium* for 7  
26 days or 22 days. (B) Enumeration of viable intracellular *S. Typhimurium* associated with  
27 CD11b<sup>+</sup> Ly6C<sup>hi</sup> Ly6G<sup>-</sup> cells (circles) and CD11b<sup>+</sup> Ly6C<sup>int</sup> Ly6G<sup>+</sup> cells (triangles) purified  
28 from spleens (left) and livers (right) of 129X1/SvJ mice (n = 4 per group per time point)  
29 infected with *S. Typhimurium* for 7 or 22 days. Purified cells were suspended in medium  
30 containing 25 µg/ml of gentamicin to kill extracellular bacteria. After 2 hours of incubation at  
31 37°C in 5% CO<sub>2</sub>, the cells were washed using PBS and lysed using 0.1% Triton X-100 to  
32 release intracellular bacteria. These bacteria were enumerated by plating onto LB agar. Data  
33 show mean with spread from a single experiment and were analyzed using a two-tailed, paired  
34 Student's t-test (A) or a two-way ANOVA with Bonferroni's post test (B); p values < 0.05  
35 were considered to be statistically significant.

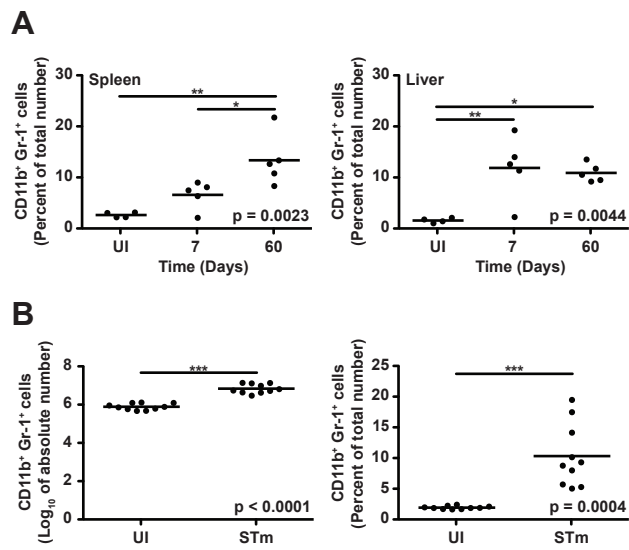

Figure S1, Tam *et al.*

**A**

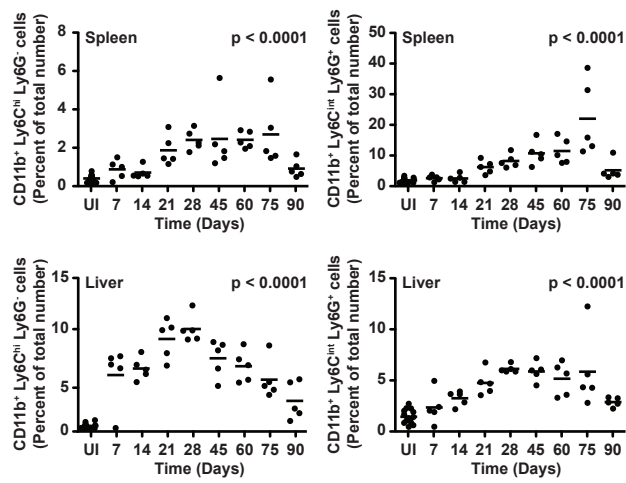

**B**

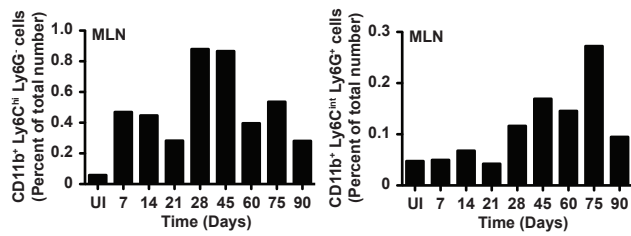

**A**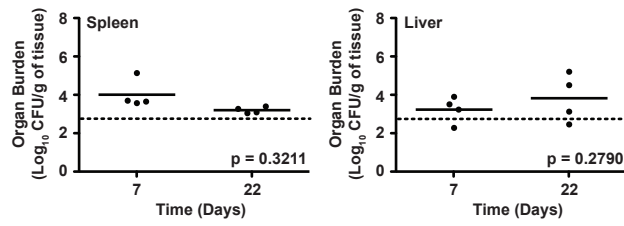**B**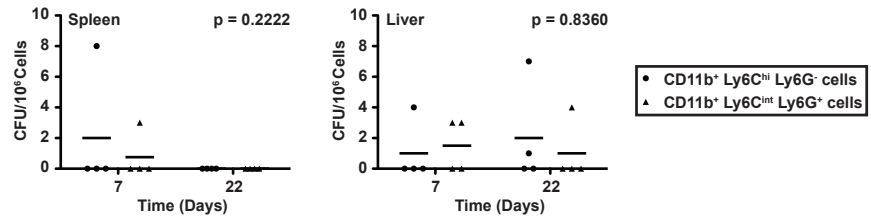

Supplement: IAI.01590-13_zii999090720so1.pdf [file IAI.01590-13_zii999090720so1.pdf]
